# Supplementary material for: Assessing treatment outcomes among peer educators living with HIV in Kenya
Source: PLoS One. 2019 Jun 27;14(6):e0218774. doi: 10.1371/journal.pone.0218774 (PMC6597086; doi:10.1371/journal.pone.0218774)
Supplement: S1 Peer Educator Dataset — (CSV) [file pone.0218774.s001.csv]

ID	Subcounty	Facility	Age	Sex	Mar_stat	WHO_stage	CD4	Dur_ARV	Curr_ARV	HT	WT	BMI	IPT	Valid_VL	VL_Value	Suppressed	LDL	Mar_Stat_Cat	WHO_stage_cat	CD4cat	Durr_ARV_Cat	Backbone	Tail	filter_$
1	Homabay	HOMABAY CRH	37	2	4	3	841	77	1	177	75	23.9	2	1	0	1	1	2	2	2	2	1	1	1
2	Homabay	HOMABAY CRH	40	2	3	2	251	120	1	172	74	25	2	1	0	1	1	2	1	2	2	1	1	1
3	Homabay	HOMABAY CRH	57	1	1	4	200	148	1	177	63	20.1	2	1	0	1	1	1	2	2	2	1	1	0
4	Homabay	HOMABAY CRH	38	2	1	1	425	96	5	178	58	18.3	2	2				1	1	2	2			1
5	Suba Team 1	KISEGI HC	40	2	4	4	43	86	1	164	86	32	2	1	0	1	1	2	2	1	2	1	1	1
6	Suba Team 1	SUBA SCH	32	2	1	2	469	25	1	164	74	27.5	2	1	0	1	1	1	1	2	1	1	1	1
7	Rangwe	NYARUT DISP	48	2	4	2	212	38	1	164	99	36.8	1	1	0	1	1	2	1	2	1	1	1	1
8	Rangwe	NYAGORO HC	48	2	4	1	1000	11	1	165	88	32.3	1	1	0	1	1	2	1	2	1	1	1	1
9	Ndhiwa Team 2	MARAM DISP	35	2	4	2	711	67	5	163	82	30.9	1	1	0	1	1	2	1	2	1			1
10	Homabay	MARINDI HC	33	2	4	1	350	91	2	170	81	28	1	1	0	1	1	2	1	2	2	2	2	1
11	Ndhiwa Team 2	OBER KABUOCH DISP	40	2	4	1	336	31	2	176	80	25.8	1	1	0	1	1	2	1	2	1	2	2	1
12	Mbita Mainland	TOM MBOYA HC	33	1	1	2	480	36	1	171	80	27.4	1	1	0	1	1	1	1	2	1	1	1	0
13	Rachuonyo North Team 1	KENDU SUBCOUNTY	46	2	1	3	220	116	3	172	78	26.4	1	1	0	1	1	1	2	2	2	1	2	1
14	Mbita Mainland	PONGE DISP	35	2	1	1	886	72	1	168	76	26.9	1	1	0	1	1	1	1	2	1	1	1	1
15	Mbita Mainland	OBALWANDA DISP	37	2	1	3	476	156	2	173	75	25.1	1	1	0	1	1	1	2	2	2	2	2	1
16	Mbita Mainland	TOM MBOYA HC	34	2	1	1	393	36	5	174	73	24.1	1	1	0	1	1	1	1	2	1			1
17	Homabay	HOMABAY CRH	33	2	1	3	263	120	2	169	72	25.2	1	1	0	1	1	1	2	2	2	2	2	1
18	Mbita Island	TAKAWIRI HC	42	2	4	3	384	143	3	165	72	26.4	1	1	0	1	1	2	2	2	2	1	2	1
19	Rangwe	NYAGORO HC	58	2	1	2	710	50	2	165	71.8	26.4	1	1	0	1	1	1	1	2	1	2	2	1
20	Homabay	HOMABAY CRH	31	2	1	3	327	58	2	175	71	23.2	1	1	0	1	1	1	2	2	1	2	2	1
21	Rangwe	RANDUNG DISP	37	2	1	2	150	81	1	162	71	27.1	1	1	0	1	1	1	1	1	2	1	1	1
22	Ndhiwa Team 2	MAGINA HC	36	2	1	2	550	117	1	176	71	22.9	1	1	0	1	1	1	1	2	2	1	1	1
23	Ndhiwa Team 2	OMBO KACHIENG DISP	47	1	1	3	57	98	2	180	70	21.6	1	1	0	1	1	1	2	1	2	2	2	0
24	Rachuonyo North Team 1	CHUTH BER DISP	40	2	1	1	705	31	1	168	69	24.4	1	1	0	1	1	1	1	2	1	1	1	1
25	Suba Team 1	MALONGO HC	26	2	1	1	350	37	1	165	68	25	1	1	0	1	1	1	1	2	1	1	1	1
26	Mbita Mainland	LAMBWE DISP	28	2	1	1	837	23	1	159	68	26.9	1	1	0	1	1	1	1	2	1	1	1	1
27	Rachuonyo North Team 1	CHUOWE DISP	47	1	1	3	39	168	1	195	68	17.9	1	1	0	1	1	1	2	1	2	1	1	0
28	Rangwe	OBWANDA DISP	40	2	4	2	205	120	3	168	68	24.1	1	1	0	1	1	2	1	2	2	1	2	1
29	Rangwe	GONGO DISP	41	1	1	1	657	13	1	174	67	22.1	1	1	0	1	1	1	1	2	1	1	1	0
30	Homabay	ACK HOPE DISP	35	2	1	4	368	90	4	163	65.8	24.8	1	1	0	1	1	1	2	2	2	2	1	1
31	Mbita Mainland	OGONGO HC	40	1	1	4	368	82	2	185	65	19	1	1	0	1	1	1	2	2	2	2	2	0
32	Homabay	MARINDI HC	32	2	4	1	13	109	2	170	65	22.5	1	1	0	1	1	2	1	1	2	2	2	1
33	Ndhiwa Team 2	AMOYO DISP	45	2	4	1	234	36	1	160	65	25.4	1	1	0	1	1	2	1	2	1	1	1	1
34	Rangwe	RANGWE SCH	35	2	1	1	486	31	3	165	65	23.9	1	1	0	1	1	1	1	2	1	1	2	1
35	Suba Team 1	NGERI DISP	32	1	1	1	358	25	1	164	64	23.8	1	1	0	1	1	1	1	2	1	1	1	0
36	Rangwe	NGEGU DISP	42	2	4	2	800	13	1	175	63.5	20.7	1	1	0	1	1	2	1	2	1	1	1	1
37	Rangwe	NDIRU HC	29	2	1	1	628	27	1	168	63.5	22.5	1	1	0	1	1	1	1	2	1	1	1	1
38	Rangwe	NYAWAWA DISP	31	2	1	1	164	22	1	163	63	23.7	1	1	0	1	1	1	1	1	1	1	1	1
39	Homabay	MAKONGENI HC	28	2	4	1	259	47	1	168	63	22.3	1	1	0	1	1	2	1	2	1	1	1	1
40	Ndhiwa Team 2	MAGINA HC	42	1	1	1	809	16	1	169	62.9	22	1	1	0	1	1	1	1	2	1	1	1	0
41	Turkana West	Kakuma Mission Hospital	44	1	1	2	459	38	1	184	62.7	18.5	1	1	0	1	1	1	1	2	1	1	1	0
42	Turkana West	AIC Lokichogio	39	1	1	3	192	68	2	179	62.3	19.4	1	1	0	1	1	1	2	1	1	2	2	0
43	Mbita Mainland	MBITA SCH	38	2	4	3	183	151	2	164	62	23.1	1	1	0	1	1	2	2	1	2	2	2	1
44	Rangwe	KAGER DISP	36	2	1	2	350	87	1	165	62	22.8	1	1	0	1	1	1	1	2	2	1	1	1
45	Mbita Island	SOKLO DISP	52	2	4	1	236	71	1	168	62	22	1	1	0	1	1	2	1	2	1	1	1	1
46	Mbita Island	SENA HC	23	2	1	1	695	23	1	165	62	22.8	1	1	0	1	1	1	1	2	1	1	1	1
47	Rachuonyo North Team 1	LELA DISP.	55	1	1	3	18	122	4	179	61	19	1	1	0	1	1	1	2	1	2	2	1	0
48	Loima	Turkwel Health Centre	24	2	1	2	652	61	2	172	60	20.3	1	1	0	1	1	1	1	2	1	2	2	1
49	Ndhiwa Team 2	KOME DISP	24	2	1	1	1761	41	1	165	60	22	1	1	0	1	1	1	1	2	1	1	1	1
50	Loima	Lorugum Dispensary	27	2	1	2	713	47	2	175	59.9	19.6	1	1	0	1	1	1	1	2	1	2	2	1
51	Mbita Island	WAKULA HC	53	1	1	3	301	131	2	176	59	19	1	1	0	1	1	1	2	2	2	2	2	0
52	Homabay	OGANDE DISP	36	2	1	2	46	83	2	162	59	22.5	1	1	0	1	1	1	1	1	2	2	2	1
53	Homabay	NYALKINYI DISP	36	2	1	1	212	128	2	165	59	21.7	1	1	0	1	1	1	1	2	2	2	2	1
54	Ndhiwa Team 2	LWANDA KOBITA DISP	38	2	1	3	700	157	1	154	59	24.9	1	1	0	1	1	1	2	2	2	1	1	1
55	Rangwe	RANGWE SCH	41	2	4	3	290	109	1	168	59	20.9	1	1	0	1	1	2	2	2	2	1	1	1
56	Homabay	NYAMASI DISP	47	1	1	1	315	53	1	171	59	20.2	1	2				1	1	2	1	1	1	0
57	Rangwe	NYAWITA DISP	38	2	1	3	301	88	1	168	58	20.5	1	1	0	1	1	1	2	2	2	1	1	1
58	Rangwe	OBUNGA DISP	37	1	1	2	340	48	3	168	58	20.5	1	1	0	1	1	1	1	2	1	1	2	0
59	Rachuonyo North Team 1	KAJIEYI DISP	47	2	1	3	42	121	2	155	57	23.7	1	1	0	1	1	1	2	1	2	2	2	1
60	Rachuonyo North Team 1	KOBUYA DISP	32	2	4	1	712	17	1	166	57	20.7	1	1	0	1	1	2	1	2	1	1	1	1
61	Suba Team 1	KISEGI HC	24	2	1	2	487	86	3	152	55	23.8	1	1	0	1	1	1	1	2	2	1	2	1
62	Homabay	MINIAMBO DISP	42	1	1	3	310	103	3	160	55	21.5	1	1	0	1	1	1	2	2	2	1	2	0
63	Homabay	ACK HOPE DISP	23	2	1	1	689	36	2	168	54.9	19.5	1	1	0	1	1	1	1	2	1	2	2	1
64	Turkana West	AIC Lokichogio	32	2	1	3	139	95	1	152	54.7	23.7	1	1	0	1	1	1	2	1	2	1	1	1
65	Loima	Lorugum Dispensary	36	1	1	2	283	57	2	162	54.4	20.7	1	1	0	1	1	1	1	2	1	2	2	0
66	Mbita Mainland	OGONGO HC	35	2	1	2	659	126	2	110	54	44.6	1	1	0	1	1	1	1	2	2	2	2	1
67	Mbita Mainland	HUMANIST HC	36	1	1	3	388	124	3	160	54	21.1	1	1	0	1	1	1	2	2	2	1	2	0
68	Rachuonyo North Team 1	KENDU SUBCOUNTY	43	2	1	3	300	79	3	168	53	18.8	1	1	0	1	1	1	2	2	2	1	2	1
69	Suba Team 1	SUBA SCH	39	2	4	3	1008	146	2	163	53	19.9	1	1	0	1	1	2	2	2	2	2	2	1
70	Suba Team 1	NYATOTO HC	38	2	1	2	358	83	1	151	53	23.2	1	1	0	1	1	1	1	2	2	1	1	1
71	Mbita Island	NGOTHE DISP	36	2	4	1	352	47	1	163	53	19.9	1	1	0	1	1	2	1	2	1	1	1	1
72	Rangwe	OBWANDA DISP	39	2	4	1	312	15	1	151	53	23.2	1	1	0	1	1	2	1	2	1	1	1	1
73	Homabay	HOMABAY CRH	43	2	4	3	338	124	3	169	52	18.2	1	1	0	1	1	2	2	2	2	1	2	1
74	Loima	Lorugum Dispensary	36	2	1	3	191	56	1	172	51.4	17.4	1	1	0	1	1	1	2	1	1	1	1	1
75	Homabay	KODUOGO DISP	32	1	1	3	198	56	1	149	50	22.5	1	1	0	1	1	1	2	1	1	1	1	0
76	Mbita Island	NYAKWERI HC	41	2	4	1	392	37	1	156	50	20.5	1	1	0	1	1	2	1	2	1	1	1	1
77	Loima	Turkwel Health Centre	35	1	1	2	298	62	1	172	49.5	16.7	1	1	0	1	1	1	1	2	1	1	1	0
78	Turkana West	Kakuma Mission Hospital	35	2	4	2	31	87	2	162	49.3	18.8	1	1	0	1	1	2	1	1	2	2	2	1
79	Homabay	MARINDI HC	42	2	4	3	136	103	5	156	49	20.1	1	1	0	1	1	2	2	1	2			1
80	Turkana West	AIC Lokichogio	30	2	1	3	592	56	1	161	48	18.5	1	1	0	1	1	1	2	2	1	1	1	1
81	Turkana West	Kakuma Mission Hospital	39	1	2	2	430	66	2	168	47	16.7	1	1	0	1	1	2	1	2	1	2	2	0
82	Rangwe	RANGWE SCH	35	2	1	1	361	39	1	161	47	18.1	1	1	0	1	1	1	1	2	1	1	1	1
83	Loima	Lorugum Dispensary	40	1	1	3	739	98	2	167	46.2	16.6	1	1	0	1	1	1	2	2	2	2	2	0
84	Loima	Turkwel Health Centre	26	1	1	3	0	26	1	176	45.9	14.8	1	2				1	2	1	1	1	1	0
85	Rangwe	NDIRU HC	31	2	4	1	406	48	1	169	58.2	20.4	1	1	0	1	1	2	1	2	1	1	1	1
86	Suba Team 2	MAGUNGA HC	29	2	1	3	39	101	2	165	66	24.2	1	1	0	1	1	1	2	1	2	2	2	1
87	Loima	Kalemunyang Dispensary	41	1	1	3	518	49	1	179	52	16.2	1	1	0	1	1	1	2	2	1	1	1	0
88	Loima	Kalemunyang Dispensary	36	2	1	2	109	25	1	174	38	12.6	1	1	0	1	1	1	1	1	1	1	1	1
89	Turkana West	Lopiding SCH	30	2	1	3	0	67	4	152	33.2	14.4	1	1	0	1	1	1	2	1	1	2	1	1
90	Ndhiwa Team 1	KACHUTH DISPENSARY	37	1	1	1	521	43	3	170	90	31.1	1	1	22	1	1	1	1	2	1	1	2	0
91	Ndhiwa Team 1	BORA BORA DISP	36	2	4	2	826	82	4	156	54	22.2	1	1	22	1	1	2	1	2	2	2	1	1
92	Homabay	HOMABAY CRH	31	2	1	2	213	126	1	161	49	18.9	1	1	23	1	1	1	1	2	2	1	1	1
93	Mbita Island	SENA HC	30	2	4	1	436	29	1	165	66	24.2	1	1	26	1	1	2	1	2	1	1	1	1
94	Ndhiwa Team 2	PALA HC	46	2	4	1	611	21	1	162	89	33.9	1	1	40	1	1	2	1	2	1	1	1	1
95	Ndhiwa Team 1	GOT KOJOWI HEALTH CENTRE	43	2	1	2	338	32	1	168	53	18.8	1	1	40	1	1	1	1	2	1	1	1	1
96	Ndhiwa Team 1	GOT KOJOWI HEALTH CENTRE	43	1	1	3	200	122	1	166	58	21	1	1	47	1	2	1	2	2	2	1	1	0
97	Ndhiwa Team 1	KWAMO DISP	45	1	1	2	284	62	2	170	56	19.4	1	1	47	1	2	1	1	2	1	2	2	0
98	Ndhiwa Team 1	MALELA DISP	41	2	4	2	521	108	2	170	69	23.9	1	1	48	1	2	2	1	2	2	2	2	1
99	Homabay	KIJAWA DISP	37	2	4	2	240	116	3	156	47	19.3	1	1	50	1	2	2	1	2	2	1	2	1
100	Rachuonyo North Team 1	KOGWENO ORIANG	33	2	4	2	500	96	2	169	65	22.8	1	1	53	1	2	2	1	2	2	2	2	1
101	Ndhiwa Team 1	GOT KOJOWI HEALTH CENTRE	43	2	1	3	257	44	1	169	69	24.2	1	1	57	1	2	1	2	2	1	1	1	1
102	Rachuonyo North Team 2	ADIEDO DISP	40	2	4	1	200	76	2	152	50	21.6	1	1	57	1	2	2	1	2	2	2	2	1
103	Rachuonyo North Team 1	OLANDO	48	2	4	3	188	133	2	163	63	23.7	1	1	58	1	2	2	2	1	2	2	2	1
104	Rachuonyo North Team 2	GOT OYARO DISP	42	2	1	2	131	177	2	158	67	26.8	1	1	58	1	2	1	1	1	2	2	2	1
105	Rachuonyo North Team 1	KOSELE	37	2	1	1	310	83	3	155	70	29.1	1	1	61	1	2	1	1	2	2	1	2	1
106	Ndhiwa Team 1	KIASA DISPENSARY	55	1	1	2	120	37	3	170	73	25.3	1	1	62	1	2	1	1	1	1	1	2	0
107	Ndhiwa Team 1	NDISI DISPENSARY	30	2	1	1	600	26	1	155	60	25	1	1	64	1	2	1	1	2	1	1	1	1
108	Rachuonyo North Team 2	HOMALIME HC	32	2	4	1	627	81	2	169	68	23.8	1	1	66	1	2	2	1	2	2	2	2	1
109	Ndhiwa Team 1	NDHIWA SUB COUNTY HOSPITAL	52	2	1	2	912	14	1	159	58	22.9	2	1	70	1	2	1	1	2	1	1	1	1
110	Ndhiwa Team 2	PONGE DISP	37	2	1	1	537	105	1	169	80	28	1	1	80	1	2	1	1	2	2	1	1	1
111	Ndhiwa Team 2	OTANGE DISP	30	2	1	1	330	27	1	165	62	22.8	1	1	81	1	2	1	1	2	1	1	1	1
112	Homabay	WIGA DISP	35	2	4	2	155	117	4	148	56	25.6	1	1	88	1	2	2	1	1	2	2	1	1
113	Homabay	KIJAWA DISP	34	2	4	1	0	49	1	164	80	29.7	1	1	100	1	2	2	1	1	1	1	1	1
114	Ndhiwa Team 2	NGUKU DISP	35	2	1	2	1090	85	3	156	80	32.9	1	1	100	1	2	1	1	2	2	1	2	1
115	Rangwe	RARIW DISP	32	2	1	1	479	32	1	165	85	31.2	1	1	102	1	2	1	1	2	1	1	1	1
116	Homabay	PALA MASOGO HC	43	2	4	1	216	25	1	159	67	26.5	1	1	109	1	2	2	1	2	1	1	1	1
117	Ndhiwa Team 2	UNGA DISP	43	2	4	2	44	123	1	162	59	22.5	1	1	145	1	2	2	1	1	2	1	1	1
118	Rachuonyo North Team 2	NYAOGA DISP	42	1	1	2	350	138	2	172	65	22	1	1	176	1	2	1	1	2	2	2	2	0
119	Homabay	OGANDE DISP	40	2	1	1	250	94	1	172	58	19.6	1	1	177	1	2	1	1	2	2	1	1	1
120	Rachuonyo North Team 2	ALUM BEACH DISP	33	2	1	2	375	68	2	162	77	29.3	1	1	181	1	2	1	1	2	1	2	2	1
121	Homabay	MINIAMBO DISP	48	2	4	2	308	20	1	160	65	25.4	1	1	208	1	2	2	1	2	1	1	1	1
122	Homabay	HOMABAY CRH	40	2	4	2	130	85	1	160	56	21.9	1	1	260	1	2	2	1	1	2	1	1	1
123	Rachuonyo North Team 2	WAGWE HC	43	1	1	1	576	105	4	177	58	18.5	1	1	308	1	2	1	1	2	2	2	1	0
124	Mbita Mainland	USAO HC	38	2	4	3	520	163	1	168	62	22	1	1	310	1	2	2	2	2	2	1	1	1
125	Ndhiwa Team 1	OKOK DISP	42	2	4	2	200	82	2	158	55	22	1	1	324	1	2	2	1	2	2	2	2	1
126	Turkana West	Kakuma Mission Hospital	27	2	1	2	372	35	1	162	48	18.3	1	1	326	1	2	1	1	2	1	1	1	1
127	Homabay	NYALKINYI DISP	36	2	1	3	126	52	5	165	54.7	20.1	1	1	379	1	2	1	2	1	1			1
128	Rachuonyo North Team 1	MIRIU H/C	32	2	4	1	320	86	2	169	65	22.8	1	1	456	1	2	2	1	2	2	2	2	1
129	Ndhiwa Team 1	ROAD BLOCK	27	2	3	2	185	73	5	160	48	18.8	1	1	478	1	2	2	1	1	2			1
130	Ndhiwa Team 2	ORIDI DISP	42	2	1	2	173	63	2	166	58	21	1	1	527	1	2	1	1	1	1	2	2	1
131	Rangwe	ONENO DISP	30	2	4	2	315	34	1	170	67	23.2	1	1	591	1	2	2	1	2	1	1	1	1
132	Mbita Mainland	MBITA SCH	49	1	1	3	570	142	2	177	70	22.3	1	1	725	1	2	1	2	2	2	2	2	0
133	Ndhiwa Team 1	lwanda awiti disp	39	2	1	3	187	133	2	153	52	22.2	1	1	784	1	2	1	2	1	2	2	2	1
134	Ndhiwa Team 1	KWAMO DISP	24	1	1	1	912	27	1	157	55	22.3	1	1	835	1	2	1	1	2	1	1	1	0
135	Turkana Central	LCRH	40	2	1	3	136	93	2	158	58.5	23.4	1	1	0	1	1	1	2	1	2	2	2	1
136	Turkana Central	LCRH	42	1	1	3	287	100	3	176	66	21.3	1	1	0	1	1	1	2	2	2	1	2	0
137	Turkana West	Makutano Health Centre	42	2	1	3	235	14	1	168	65.8	23.3	1	1	0	1	1	1	2	2	1	1	1	1
138	Turkana Central	LCRH	74	2	4	3	456	137	4	141	58.9	29.6	1	1	0	1	1	2	2	2	2	2	1	1
139	Turkana Central	LCRH	41	1	1	3	292	88	2	180	56.9	17.6	1	1	0	1	1	1	2	2	2	2	2	0
140	Turkana Central	LCRH	37	2	1	2	474	130	2	164	54.5	20.3	1	1	0	1	1	1	1	2	2	2	2	1
141	Turkana West	Makutano Health Centre	28	2	1	2	0	49	2	163	50	18.8	1	1	0	1	1	1	1	1	1	2	2	1
142	Turkana Central	LCRH	42	2	4	3	382	80	3	165	47.5	17.4	1	1	0	1	1	2	2	2	2	1	2	1
143	Turkana Central	LCRH	36	2	4	3	639	85	2	168	46.6	16.5	1	1	0	1	1	2	2	2	2	2	2	1
144	Ruaraka	NYS H/Qs (D)	51	2	4	4	40	170	1	169	51	17.9	1	1	504	1	2	2	2	1	2	1	1	1
145	Turkana Central	LCRH	45	2	4	3	68	102	5	150	62.4	27.7	1	1	0	1	1	2	2	1	2			1
146	Suba Team 2	LWANDA GWASI HC	34	2	4	2	341	75	2	169	98	34.3	1	1	0	1	1	2	1	2	2	2	2	1
147	Suba Team 2	MAGUNGA HC	50	1	1	3	113	105	2	164	67	24.9	1	1	0	1	1	1	2	1	2	2	2	0
148	Suba Team 2	NYANDIWA HC	42	2	4	1	19	88	5	165	65	23.9	1	2				2	1	1	2			1
149	Suba Team 2	GOD BURA HC	35	1	1	1	327	65	4	165	63	23.1	1	1	0	1	1	1	1	2	1	2	1	0
150	Kisumu East	AP Kisumu	44	2	4	1	421	23	2	160	83	32.4	1	1	0	1	1	2	1	2	1	2	2	1
151	Lugari	NYS Turbo	32	2	1	2	1056	20	1	168	64	22.7	1	1	0	1	1	1	1	2	1	1	1	1
152	Kisumu East	KP Kisumu	47	2	1	3	169	140	2	165	64	23.5	1	1	0	1	1	1	2	1	2	2	2	1
153	Makadara	South B police	43	2	2	3	250	116	3	160	56	21.9	1	1	0	1	1	2	2	2	2	1	2	1
154	Langata	Dog Unit	36	2	4	2	287	116	4	169	70	24.5	1	1	0	1	1	2	1	2	2	2	1	1
155	Igembe Central	Kina Murera	31	2	1	2	295	23	1	160	45	17.6	1	1	0	1	1	1	1	2	1	1	1	1
156	Embakasi East	GSU T/S	39	2	1	2	325	145	2	155	65	27.1	1	1	0	1	1	1	1	2	2	2	2	1
157	Kibera	AP Uhuru Camp	41	2	2	4	11	152	3	166	63	22.9	1	1	0	1	1	2	2	1	2	1	2	1
158	Gilgil	ASTU	35	2	1	2	265	67	2	153	54	23.1	1	1	0	1	1	1	1	2	1	2	2	1
159	Yatta	NYS Mavoloni	42	2	2	3	250	107	2	158	60	24	1	1	0	1	1	2	2	2	2	2	2	1
160	Homabay	KWS Ruma	42	1	1	1	0	50	1	166	68	24.7	2	1	0	1	1	1	1	1	1	1	1	0
161	Garissa	KP Garissa	24	2	1	3	343	33	3	152	62	26.8	2	1	0	1	1	1	2	2	1	1	2	1
162	Turkana Central	LCRH	38	2	1	1	266	41	1	167	88.3	31.7	1	1	0	1	1	1	1	2	1	1	1	1
163	Ndhiwa Team 1	MALELA DISP	55	2	4	1	600	56	1	168	84	29.8	1	1	0	1	1	2	1	2	1	1	1	1
164	Ndhiwa Team 1	OKOK DISP	46	2	4	1	600	56	1	167	84	30.1	1	1	0	1	1	2	1	2	1	1	1	1
165	Embakasi East	APTC	30	2	2	2	238	21	1	170	83.3	28.8	1	1	0	1	1	2	1	2	1	1	1	1
166	Likoni	NYS Kilindini	40	2	2	3	345	107	3	168	77	27.3	1	1	0	1	1	2	2	2	2	1	2	1
167	Mvita	AP Tononoka	52	2	2	2	250	93	2	157	75	30.4	1	1	0	1	1	2	1	2	2	2	2	1
168	Turkana West	Kakuma Mission Hospital	34	2	1	3	458	105	2	175	75	24.5	1	1	0	1	1	1	2	2	2	2	2	1
169	Turkana Central	LCRH	42	2	1	1	0	37	2	165	72	170.4	1	1	0	1	1	1	1	1	1	2	2	1
170	Ndhiwa Team 1	OSANO NURSING HOME	25	2	1	1	932	29	1	168	72	25.5	1	1	0	1	1	1	1	2	1	1	1	1
171	Ndhiwa Team 1	NDHIWA SUB COUNTY HOSPITAL	25	2	1	2	348	35	1	169	68	23.8	1	1	0	1	1	1	1	2	1	1	1	1
172	Ndhiwa Team 1	KOBODO DISP	42	2	4	3	418	92	3	170	68	23.5	1	1	0	1	1	2	2	2	2	1	2	1
173	Isiolo	APU Isiolo	37	2	4	2	345	54	1	172	65	22	1	1	0	1	1	2	1	2	1	1	1	1
174	Turkana north	LOARENGAK H/CENTRE	42	2	1	3	538	112	2	166	64.5	23.4	1	1	0	1	1	1	2	2	2	2	2	1
175	Ndhiwa Team 2	PALA HC	33	2	1	2	299	81	2	167	64	22.9	1	1	0	1	1	1	1	2	2	2	2	1
176	Turkana Central	LCRH	65	1	1	1	0	107	2	167	63.3	22.7	1	1	0	1	1	1	1	1	2	2	2	0
177	Gilgil	NYS Gilgil	47	2	4	4	3	134	1	160	63	24.6	1	1	0	1	1	2	2	1	2	1	1	1
178	Turkana north	Lokitaung SDH	32	2	1	1	724	5	2	158	63	25.2	1	1	0	1	1	1	1	2	1	2	2	1
179	Ndhiwa Team 1	KIASA DISPENSARY	54	1	1	2	576	76	2	174	63	20.8	1	1	0	1	1	1	1	2	2	2	2	0
180	Ndhiwa Team 1	KACHUTH DISPENSARY	39	2	1	2	300	25	1	168	63	22.3	1	1	0	1	1	1	1	2	1	1	1	1
181	Ndhiwa Team 1	KADHOLA DISP	41	2	4	2	678	105	2	175	62	20.2	1	1	0	1	1	2	1	2	2	2	2	1
182	Turkana north	LOARENGAK H/CENTRE	54	1	1	3	478	57	2	164	59	21.9	1	1	0	1	1	1	2	2	1	2	2	0
183	Ruaraka	GSU H/Qs	21	2	3	3	330	50	2	164	58	21.6	1	1	0	1	1	2	2	2	1	2	2	1
184	Ndhiwa Team 1	NDHIWA SUB COUNTY HOSPITAL	41	2	1	3	368	102	1	158	57	22.8	1	1	0	1	1	1	2	2	2	1	1	1
185	Emali	AP EMALI	34	2	4	1	435	27	1	157	56	22.7	1	1	0	1	1	2	1	2	1	1	1	1
186	Mvita	GSU S/H	35	2	3	1	9	25	1	161	54	20.8	1	1	0	1	1	2	1	1	1	1	1	1
187	Turkana north	Lokitaung SDH	49	1	1	3	36	69	2	182	52.7	15.9	1	1	0	1	1	1	2	1	1	2	2	0
188	Turkana north	NARIOKOTOME DISPENSARY	39	1	1	1	0	37	2	166	52	18.9	1	1	0	1	1	1	1	1	1	2	2	0
189	Turkana north	Lokitaung SDH	42	1	1	3	1022	84	2	166	52	18.9	1	1	0	1	1	1	2	2	2	2	2	0
190	Ndhiwa Team 1	NDHIWA SUB COUNTY HOSPITAL	32	2	1	3	345	35	1	168	51	18.1	1	1	0	1	1	1	2	2	1	1	1	1
191	Turkana north	Lokitaung SDH	42	2	1	3	0	103	2	160	50	19.5	1	1	0	1	1	1	2	1	2	2	2	1
192	Turkana West	Kakuma Mission Hospital	31	1	3	2	96	68	1	169	45.7	16	1	1	0	1	1	2	1	1	1	1	1	0
193	Turkana West	Kakuma Mission Hospital	41	2	2	4	11	87	1	152	35.9	15.5	1	1	0	1	1	2	2	1	2	1	1	1
194	Rachuonyo North Team 2	OMBOGA DISP	40	2	4	2	47	127	1	155	82	34.1	1	1	0	1	1	2	1	1	2	1	1	1
195	Suba Team 2	NYANDIWA HC	47	2	1	1	672	35	1	165	81	29.8	1	1	0	1	1	1	1	2	1	1	1	1
196	Rachuonyo North Team 2	KANDIEGE HC	41	2	4	2	308	59	2	157	72	29.2	1	1	0	1	1	2	1	2	1	2	2	1
197	Rachuonyo North Team 2	OKIKI AMAYO HC	40	2	4	1	329	98	4	160	70	27.3	1	1	0	1	1	2	1	2	2	2	1	1
198	Rachuonyo North Team 2	NGETA	30	2	4	1	249	79	1	175	68	22.2	1	1	0	1	1	2	1	2	2	1	1	1
199	Rachuonyo North Team 2	SIMBI KOGEMBO DISP	52	1	1	1	324	144	2	180	67	20.7	1	1	0	1	1	1	1	2	2	2	2	0
200	Rachuonyo North Team 2	RARUOWA	36	2	4	3	210	79	2	160	67	26.2	1	1	0	1	1	2	2	2	2	2	2	1
201	Rachuonyo North Team 2	WAGWE HC	34	2	1	3	210	37	3	163	66	24.8	1	1	0	1	1	1	2	2	1	1	2	1
202	Suba Team 2	KIGWA HC	28	1	1	3	218	101	1	177	65	20.7	1	1	0	1	1	1	2	2	2	1	1	0
203	Rachuonyo North Team 2	OMBOGA DISP	42	2	4	3	275	50	3	179	64	20	1	1	0	1	1	2	2	2	1	1	2	1
204	Rachuonyo North Team 2	KANDIEGE HC	45	2	4	3	32	105	4	170	63	21.8	1	1	0	1	1	2	2	1	2	2	1	1
205	Rachuonyo North Team 2	OKIKI AMAYO HC	39	2	1	2	324	109	3	158	62	24.8	1	1	0	1	1	1	1	2	2	1	2	1
206	Suba Team 2	NYANDIWA HC	23	1	3	1	634	48	1	176	59	19	1	1	0	1	1	2	1	2	1	1	1	0
207	Suba Team 2	TONGA HC	39	1	1	1	510	97	1	152	50	21.6	1	1	0	1	1	1	1	2	2	1	1	0
208	Langata	GSU KIBERA	27	2	3	3	240	1	3	158	65	26	1	1	0	1	1	2	2	2	1	1	2	1
209	Turkana West	Lopiding SCH	43	1	1	2	802	77	4	168	59	20.9	1	2				1	1	2	2	2	1	0
210	Suba Team 2	SEKA HC	24	2	1	1	254	25	1	156	57	23.4	1	1	1000	2	2	1	1	2	1	1	1	1
211	Suba Team 1	NYATOTO HC	23	2	3	1	200	73	2	154	58	24.5	1	1	2039	2	2	2	1	2	2	2	2	1
212	Turkana Central	LCRH	42	1	1	3	37	85	1	180	55.9	17.3	1	1	2584	2	2	1	2	1	2	1	1	0
213	Turkana West	Kakuma Mission Hospital	16	1	3	2	195	76	1	171	49.2	16.8	1	1	3110	2	2	2	1	1	2	1	1	0
214	Homabay	MARINDI HC	24	2	1	2	492	34	1	164	60	22.3	1	1	6750	2	2	1	1	2	1	1	1	1
215	Turkana Central	LCRH	28	2	1	1	98	48	2	161	65	25.1	1	1	10641	2	2	1	1	1	1	2	2	1
216	Turkana Central	LCRH	37	1	1	3	283	91	2	179	52	16.2	1	1	10991	2	2	1	2	2	2	2	2	0
218	Turkana West	Makutano Health Centre	65	1	1	3	0	96	5	165	55	20.2	1	1	24344	2	2	1	2	1	2			0
219	Turkana north	KATABOI DISPENSARY	32	1	1	1	0	66	3	168	48.2	17.1	1	1	58719	2	2	1	1	1	1	1	2	0
220	Turkana Central	LCRH	52	1	1	3	545	75	3	169	50.5	17.7	1	1	11068	2	2	1	2	2	2	1	2	0
221	Kakamega	AP Kakamega	41	2	1	3	160	72	5	157	69.2	28.1	1	1	4100	2	2	1	2	1	1			1
222	Ndhiwa Team 1	NDHIWA SUB COUNTY HOSPITAL	46	2	1	2	283	1	1	169	72	25.2	2	2				1	1	2	1	1	1	1
223	Tranzoia	MT Elgon	41	2	4	3	187	81	3	160	66	25.8	1	1	0	1	1	2	2	1	2	1	2	1
224	Loima	Turkwel Health Centre	34	2	1	3	354	64	2	164	53.9	20	1	2				1	2	2	1	2	2	1
225	Loima	Namorupus Dispensary	29	1	1	2	0	21	1	170	53	18.3	1	1	0	1	1	1	1	1	1	1	1	0
226	Loima	Namorupus Dispensary	48	1	1	3	0	134	1	180	51.9	16	1	1	0	1	1	1	2	1	2	1	1	0
227	Loima	Nadapal Dispensary	40	2	1	2	251	20	1	162	48	18.3	1	2				1	1	2	1	1	1	1
228	Msambweni	Shimoni	53	1	1	3	208	132	3	162	53	20.2	1	1	0	1	1	1	2	2	2	1	2	0
229	Suba Team 1	NYAMRISRA HC	40	2	4	1	50	146	5	166	70	25.4	2	1	0	1	1	2	1	1	2			1
230	Rachuonyo North Team 1	MIRIU H/C	44	2	1	3	241	87	2	162	77	29.3	1	1	0	1	1	1	2	2	2	2	2	1
231	Suba Team 1	SUBA SCH	35	2	1	2	300	134	2	153	75	32	1	1	0	1	1	1	1	2	2	2	2	1
